# Supplementary material
Source: PubMed Central journal article supplement (PMC6789906)
Supplement: pnas.1906600116.sapp.pdf [file pnas.1906600116.sapp.pdf]

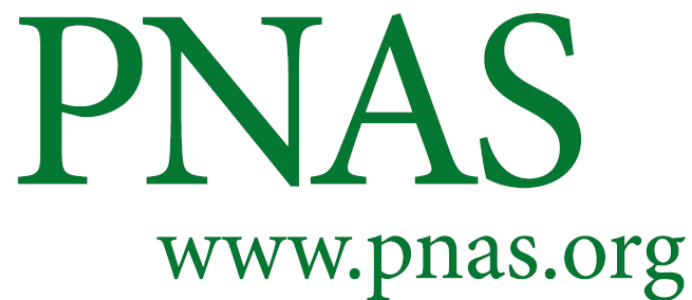

## Supplementary Information for

Unusual dynamics of the divergent malaria parasite *PfAct1* actin filament

Hailong Lu, Patricia M. Fagnant and Kathleen M. Trybus

Email: [kathleen.trybus@uvm.edu](mailto:kathleen.trybus@uvm.edu)

### **This PDF file includes:**

Figs. S1 to S4  
Captions for movies S1 to S6

### **Other supplementary materials for this manuscript include the following:**

Movies S1 to S6

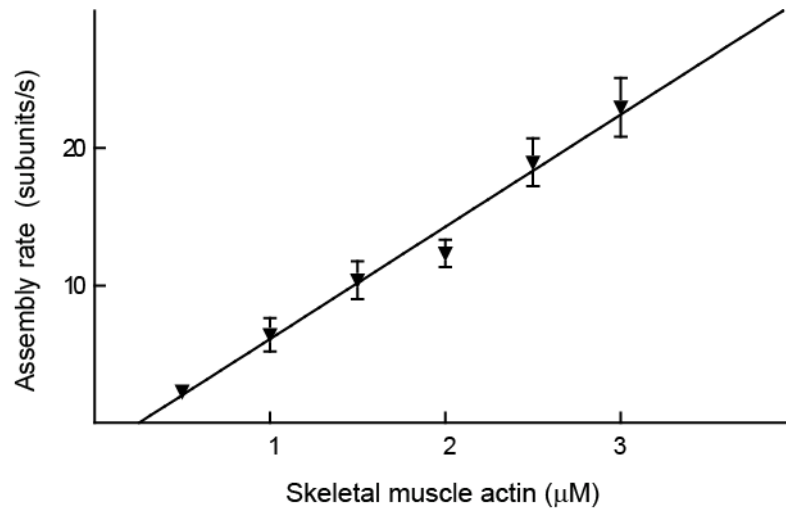

**Fig. S1.** Polymerization rate as a function of skeletal muscle actin concentration in the presence of actin-chromobody Emerald to visualize the filaments. Assembly rate (slope), 8.2 subunits/ $\mu\text{M}\cdot\text{s}$ ; disassembly rate (y-intercept 2.1 subunits/s; critical concentration, 0.25 (x-intercept)  $\mu\text{M}$ . See Table 1.

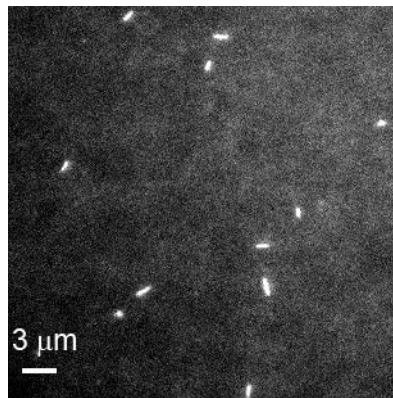

**Fig. S2.** 65  $\mu\text{M}$  *PfAct1*-ADP forms short filaments after 3 min. Bar, 3  $\mu\text{m}$ .

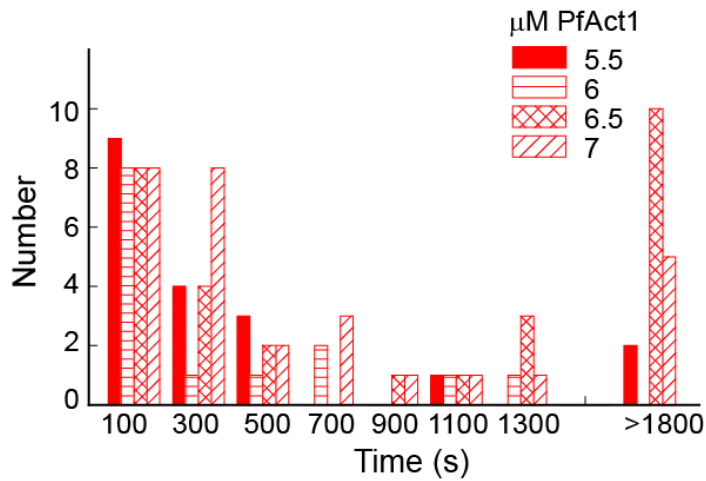

**Fig. S3.** The distribution of starting times at which the pointed end begins to depolymerize for 5.5-7  $\mu\text{M}$  G-actin. The last bin consist of filaments that remain intact after 30 min, which varied from 10-35% of the total. Data from 2 experiments with 2 *PfAct1* preparations.

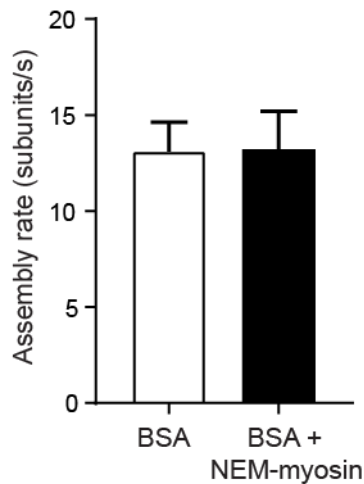

**Fig. S4.** *PfAct1* assembly rate on different coverslip surfaces. Rate of polymerization of 8  $\mu\text{M}$  *PfAct1* on coverslips coated with 5 mg/ml BSA only versus coated first with 0.02 mg/ml NEM-myosin followed by 5 mg/ml BSA. Error bar is standard deviation.

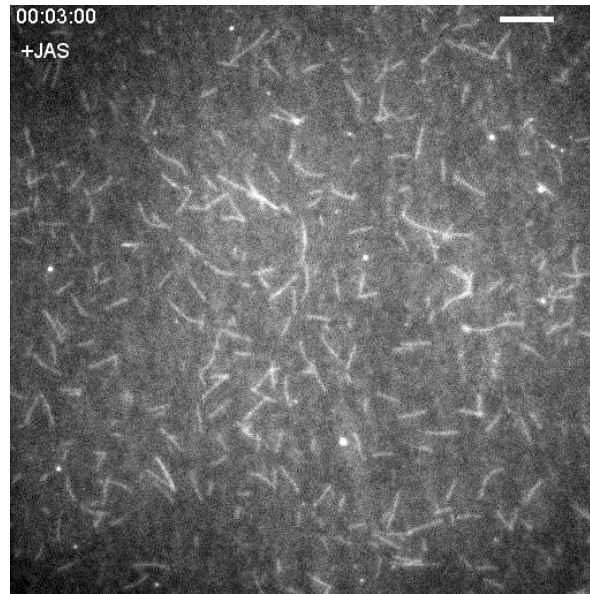

**Movie S1.** Polymerization of *PfAct1* in the presence of jasplakinolide (JAS). Growth of 1  $\mu\text{M}$  *PfAct1* as a function of time in the presence of 2.5  $\mu\text{M}$  JAS. Filaments were visualized with 0.5  $\mu\text{M}$  actin-chromobody (ChromoTek). Frame rate, 20x real time; bar, 5  $\mu\text{m}$ .

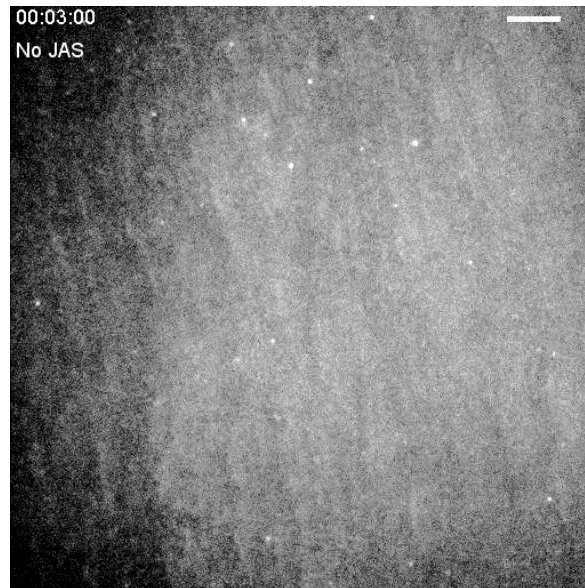

**Movie S2.** No polymerization of 1  $\mu\text{M}$  *PfAct1* without JAS. Filaments were visualized with 0.5  $\mu\text{M}$  actin-chromobody (ChromoTek). Frame rate, 20x real time; bar, 5  $\mu\text{m}$ .

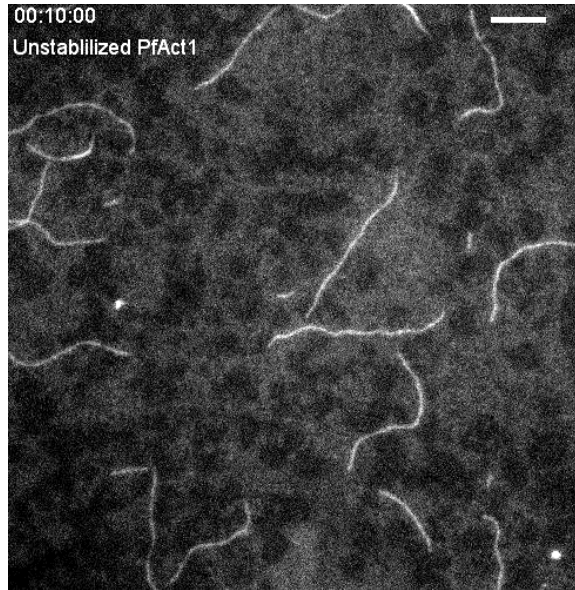

**Movie S3.** Polymerization of 7  $\mu\text{M}$  PfAct1 without JAS. Filaments show dynamic behavior at both the barbed and pointed ends. Filaments were visualized with 0.5  $\mu\text{M}$  actin-chromobody (ChromoTek). Frame rate, 120x real time; bar, 5  $\mu\text{m}$ .

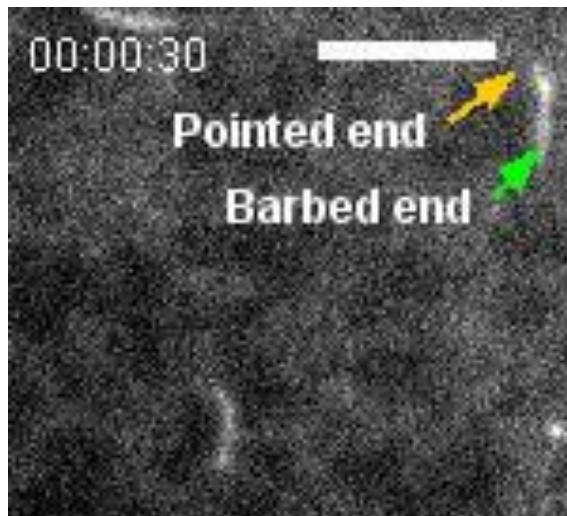

**Movie S4.** Zoom in of a few filaments from Movie S3. Filaments show dynamic behavior at both the barbed and pointed ends. Filaments were visualized with 0.5  $\mu\text{M}$  actin-chromobody (ChromoTek). Frame rate, 60x real time; bar, 5  $\mu\text{m}$ .

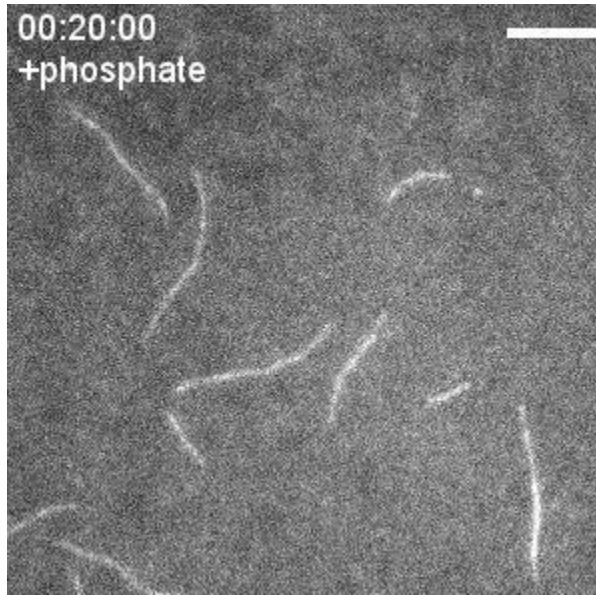

**Movie S5.** Polymerization of 7  $\mu\text{M}$  *PfAct1* in the presence of 12.5 mM phosphate. Phosphate slows the fast pointed end kinetics. Filaments were visualized with 0.5  $\mu\text{M}$  actin-chromobody (ChromoTek). Frame rate, 120x real time; bar, 5  $\mu\text{m}$ .

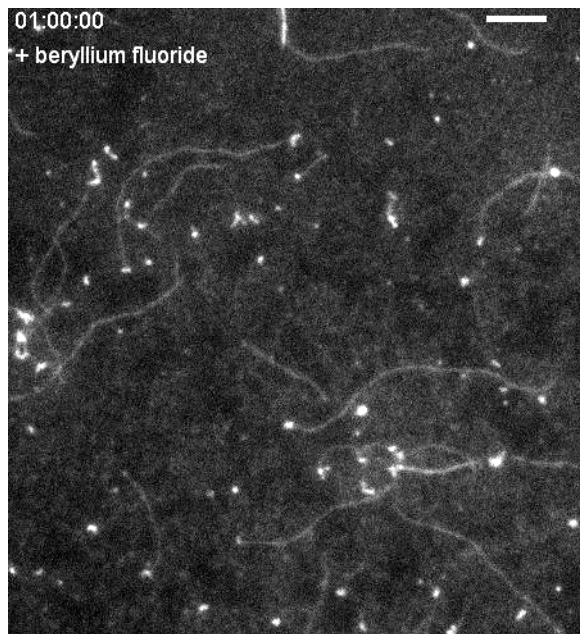

**Movie S6.** Polymerization of 7  $\mu\text{M}$  *PfAct1* in the presence of 2.5 mM  $\text{BeF}_2$ . Beryllium fluoride suppresses fast depolymerization from the pointed end. Many filaments have a short bright oligomer at the pointed end. Filaments were visualized with 0.5  $\mu\text{M}$  actin-chromobody (hromoTek). Frame rate, 120x real time; bar, 5  $\mu\text{m}$ .
